# Supplementary material for: The Murray collection of pre-antibiotic era Enterobacteriacae: a unique research resource
Source: PubMed Central journal article supplement (PMC4584482; doi:10.1186/s13073-015-0222-7), 2015-09-28
Supplement: 13073_2015_222_MOESM4_ESM.pdf [file 13073_2015_222_MOESM4_ESM.pdf]

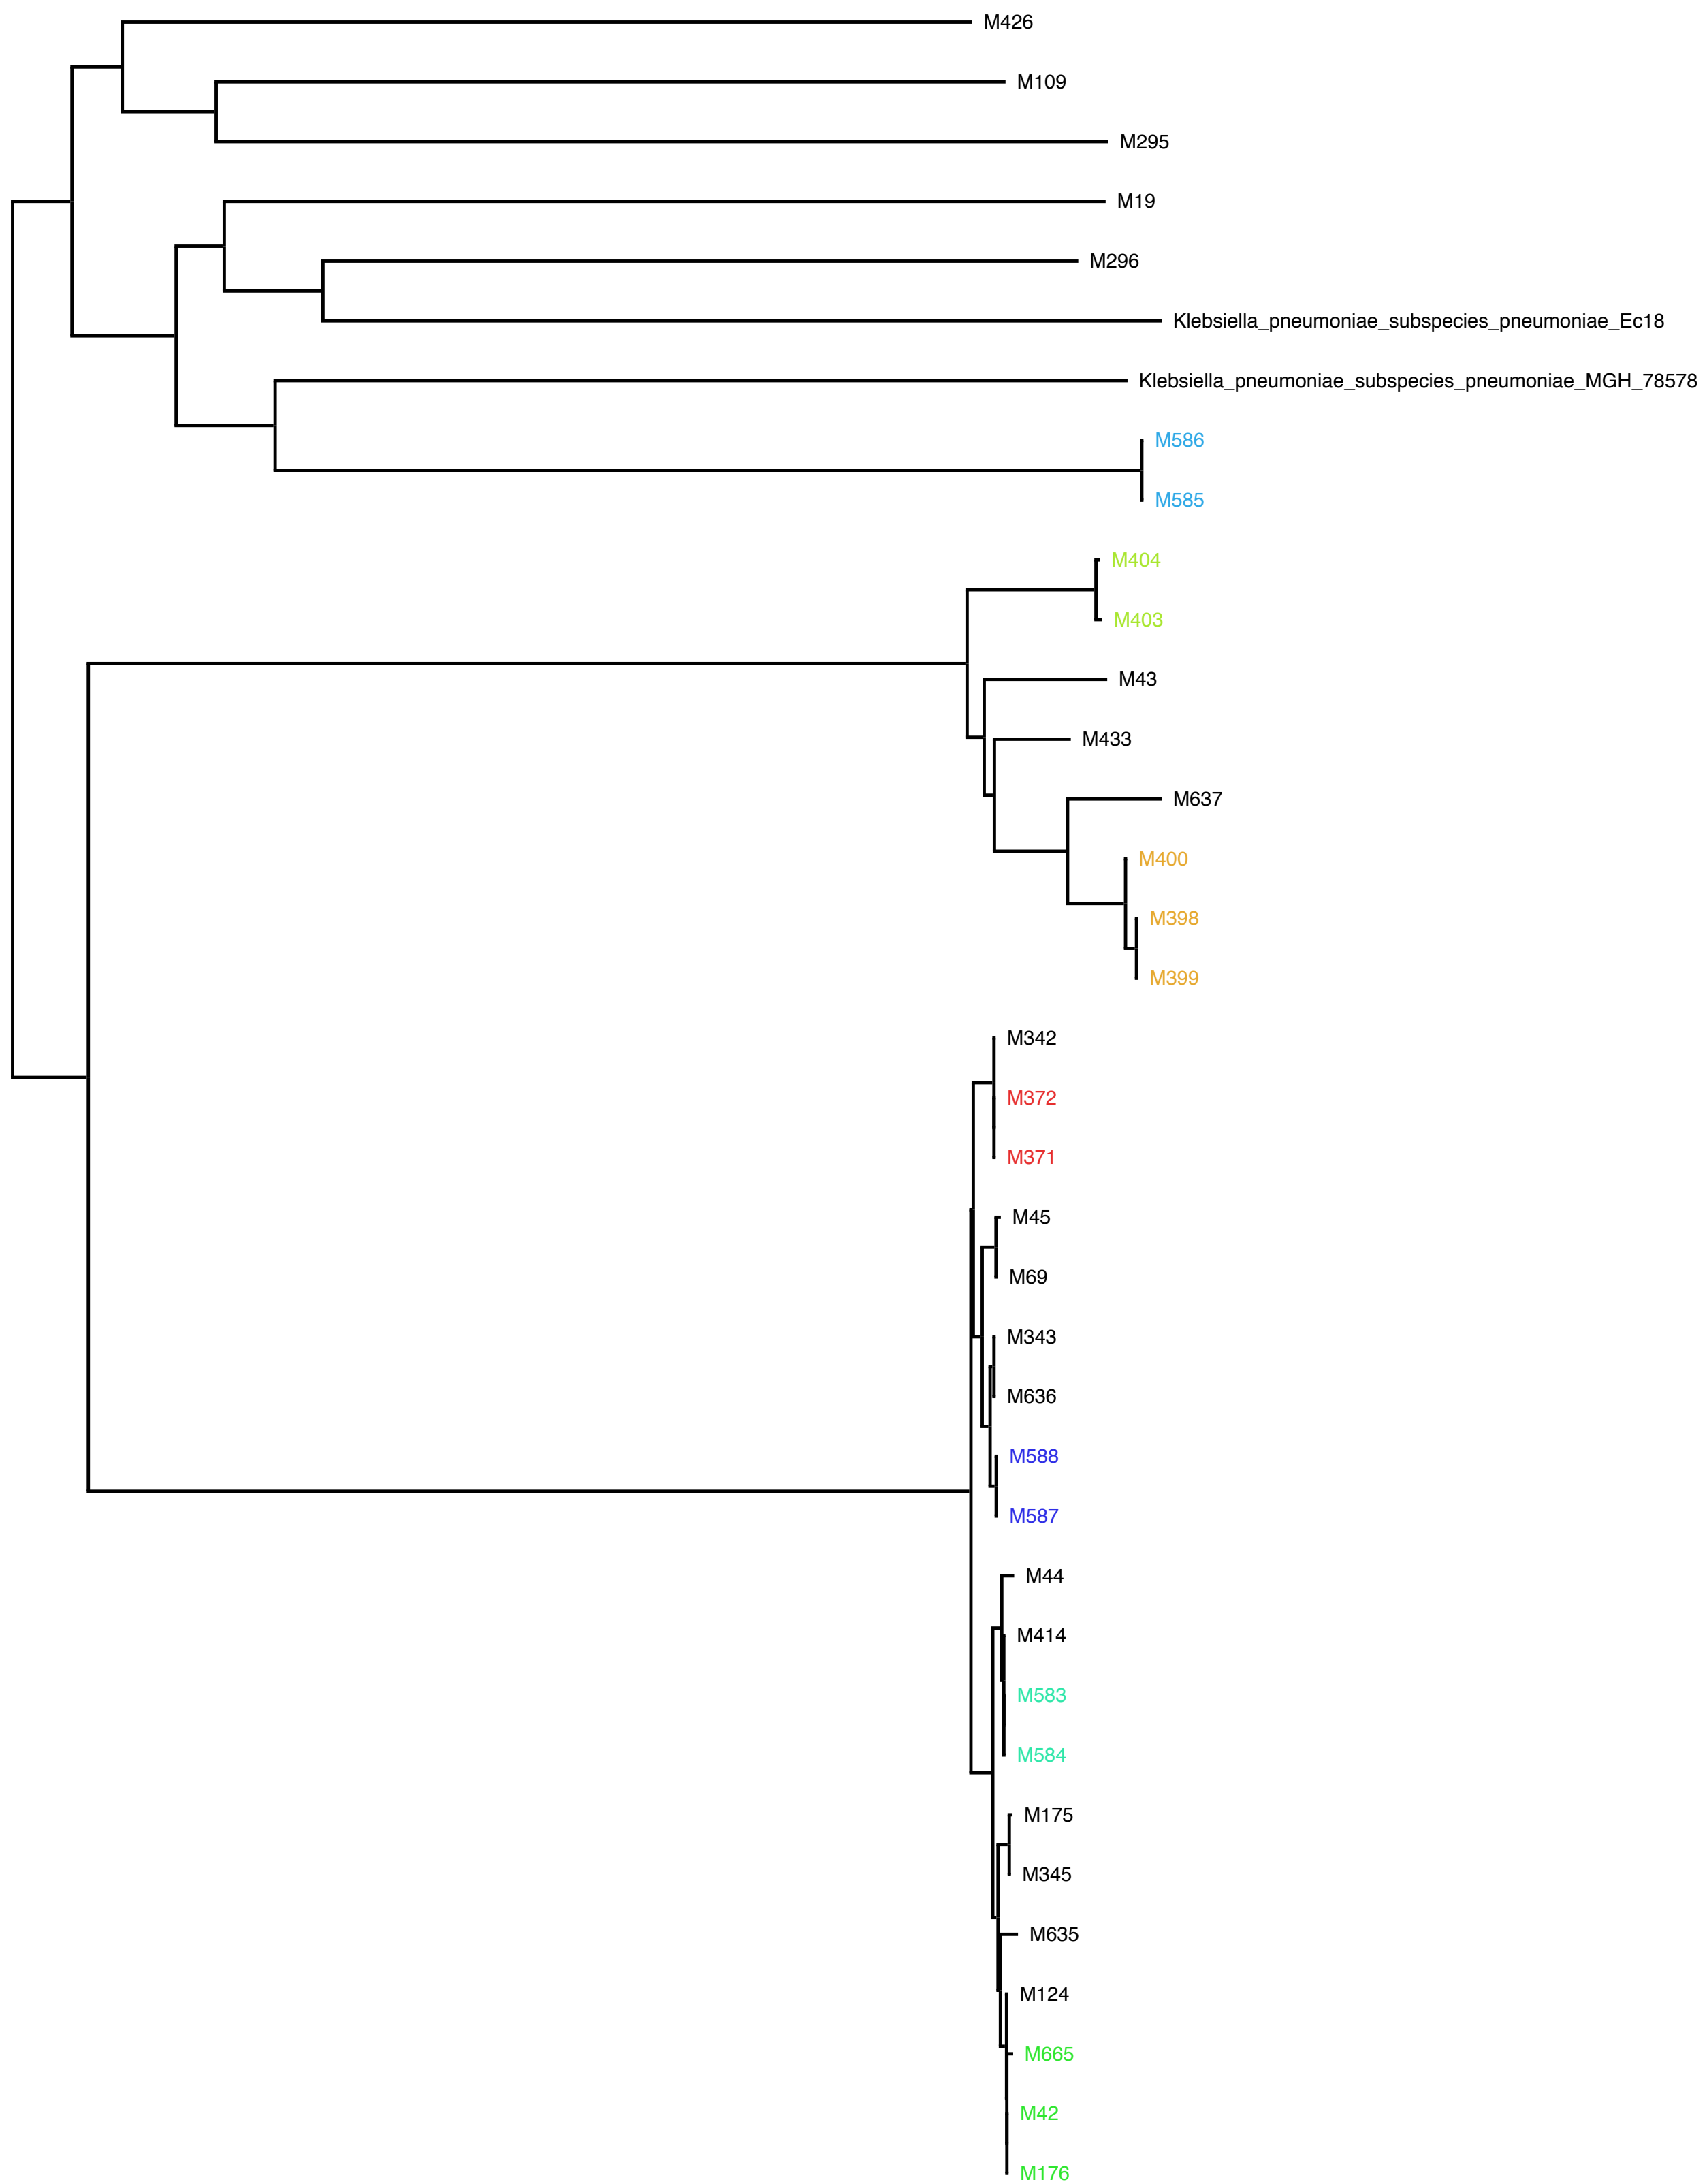

1411 SNPs
