# Supplementary material for: The Murray collection of pre-antibiotic era Enterobacteriacae: a unique research resource
Source: Springer Nature journal article supplement (doi:10.1186/s13073-015-0222-7), 2015-09-18
Supplement: MOESM2 [file 13073_2015_222_MOESM2_ESM.pdf]

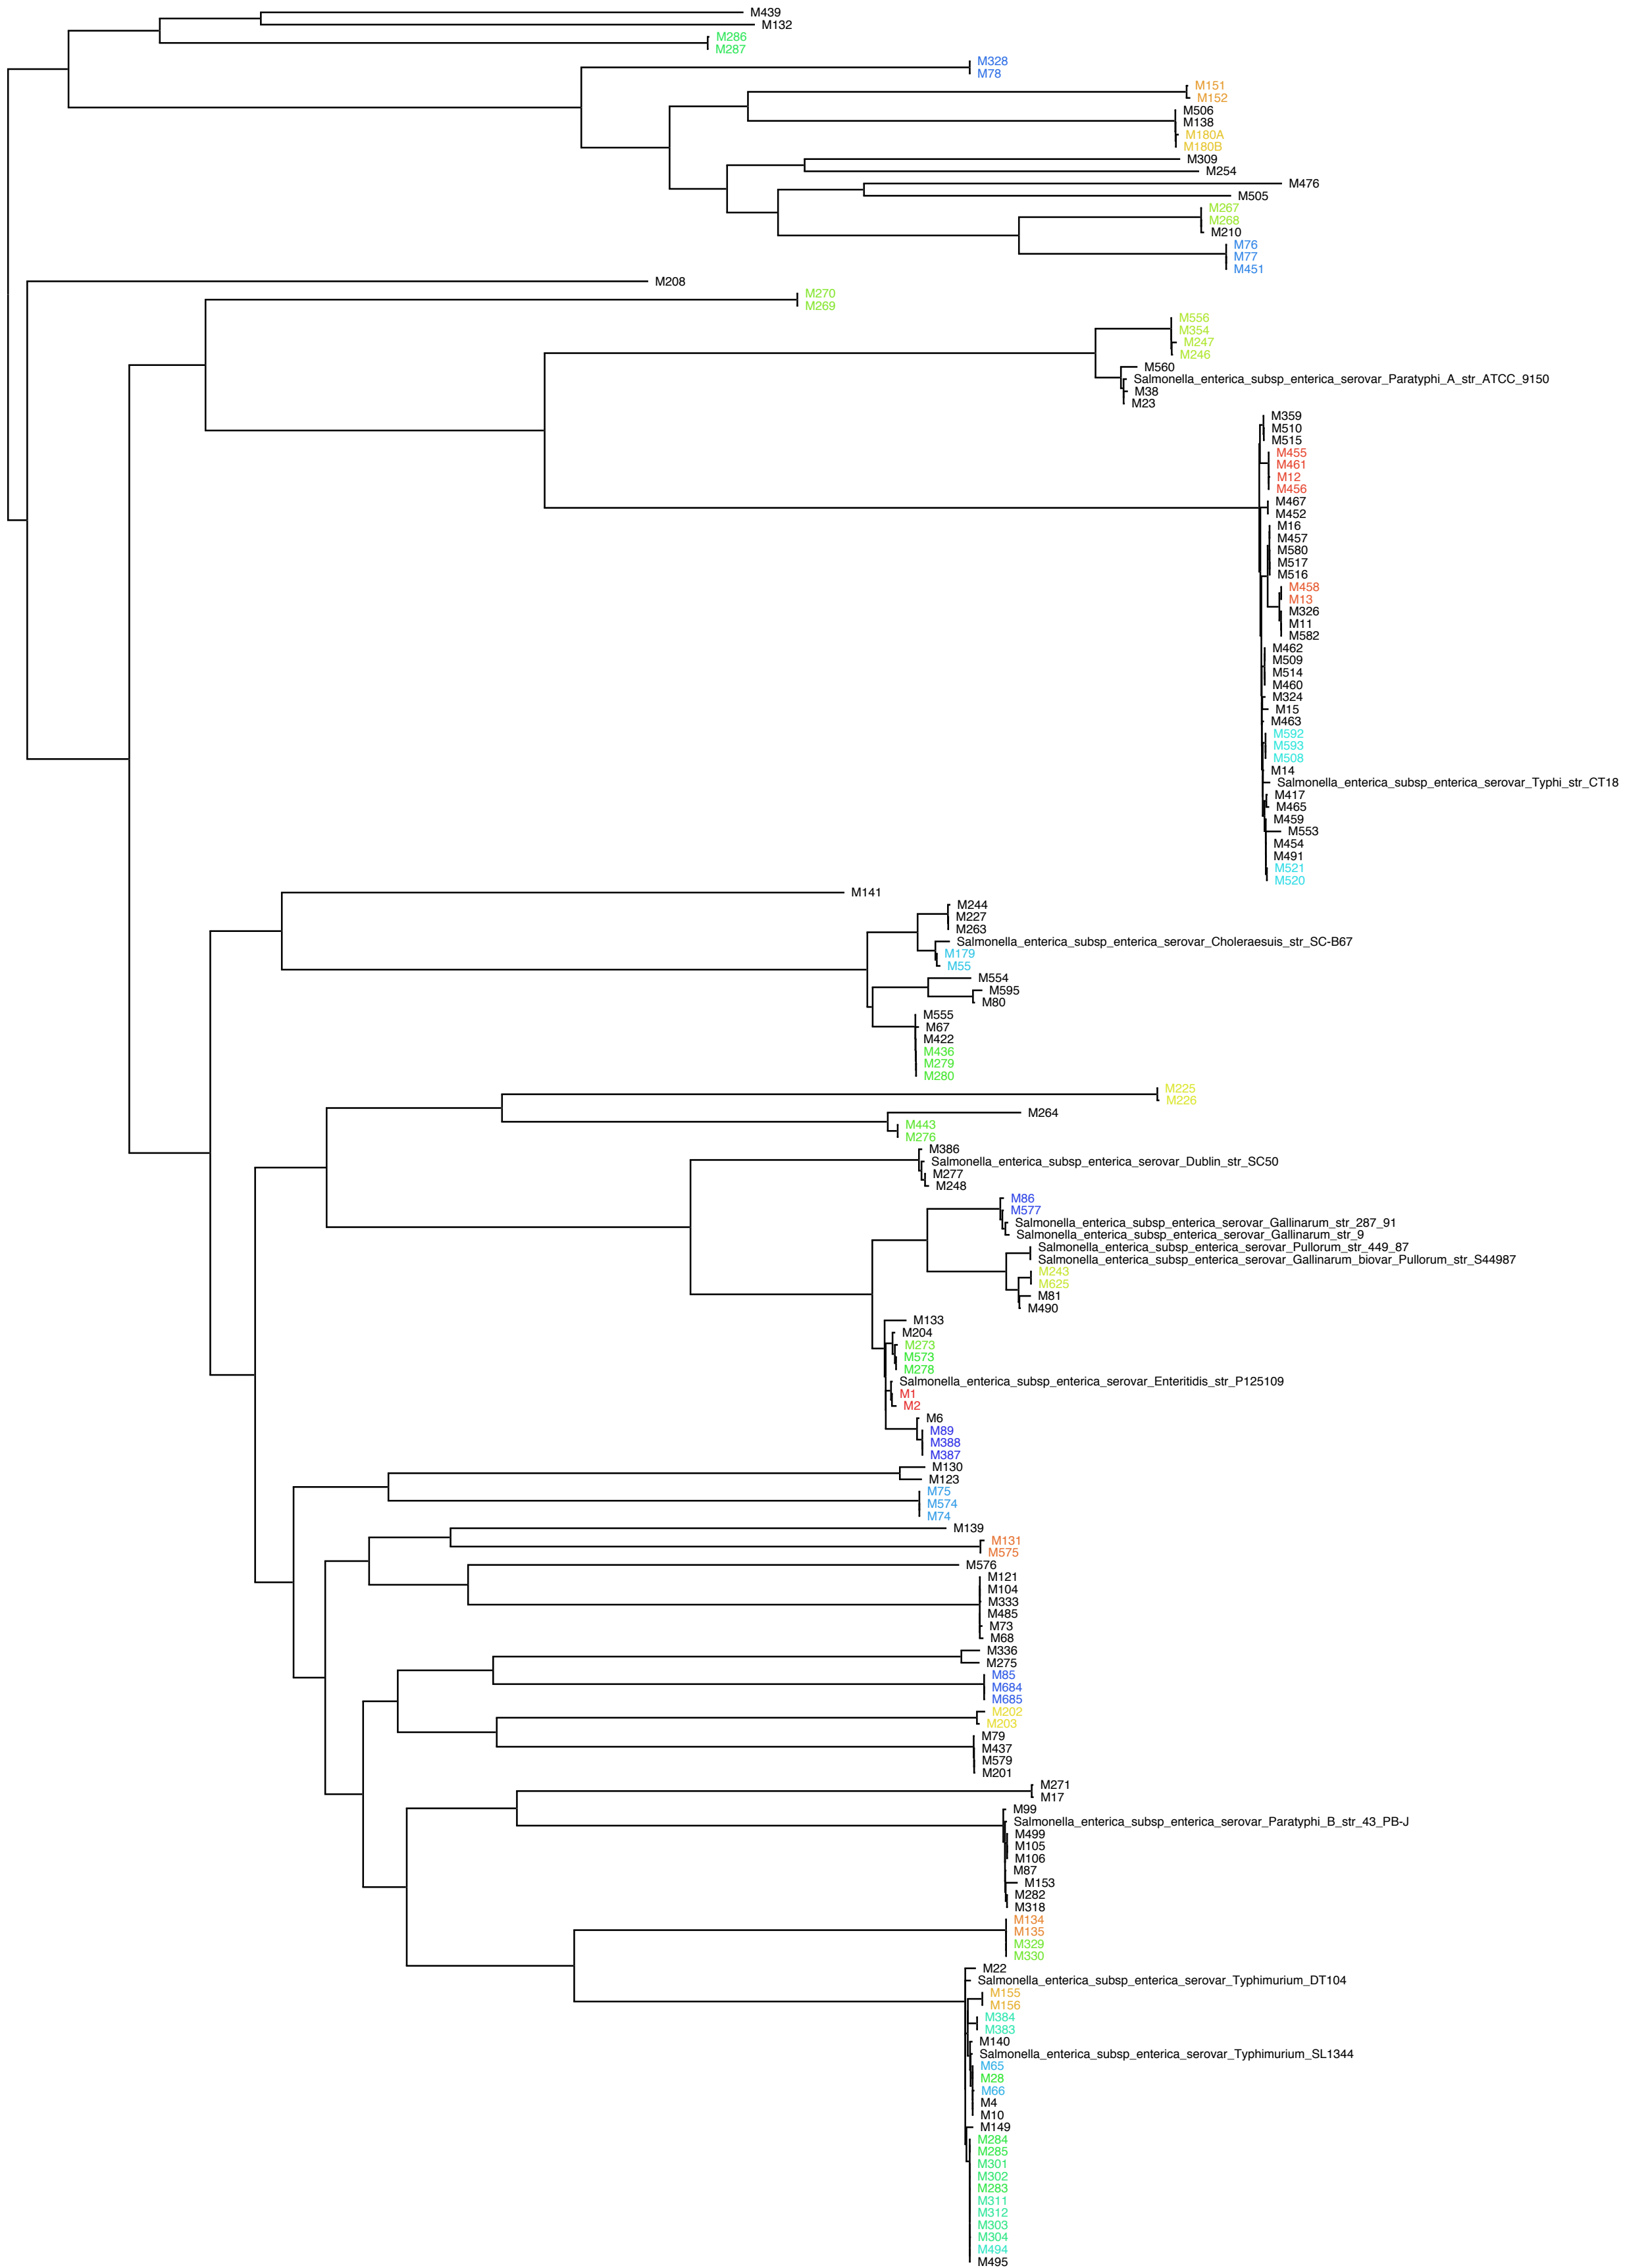

3148 SNPs
